# Supplementary material for: Alkali-regulated Fe6 and Fe18 molecular clusters and their structural transformation
Source: Royal Society of Chemistry journal article supplement (doi:10.1039/d1qi00750e), 2021-01-01
Supplement: d1qi00750e1.pdf [file d1qi00750e1.pdf]

## Electronic Supplementary Information (ESI)

# Alkali-regulated Fe<sub>6</sub> and Fe<sub>18</sub> molecular clusters and their structural transformation

Xiao-Yu Li,<sup>a,‡</sup> Ying Zou,<sup>a,‡</sup> Song-De Han,<sup>a</sup> and Guo-Ming Wang<sup>\*a</sup>

<sup>a</sup> College of Chemistry and Chemical Engineering, Qingdao University, Shandong 266071, China.

E-mail: gmwang\_pub@163.com.

<sup>‡</sup>These authors contributed equally.

## Experiment details

All chemicals and solvents used in the syntheses were of analytical grade and used without further purification. IR spectra were recorded on ABB Bomem MB 102 series FT-IR spectrometer with KBr pellets in the frequency range of 4000-400  $\text{cm}^{-1}$ . The elemental analyses (C, H, N contents) were determined on a Vario EL cube analyzer. Powder X-ray diffraction (PXRD) data were collected on a Rigaku SmartLab (3 kW) X-ray diffractometer with Cu  $K\alpha$  radiation. Thermogravimetric analyses (TGA) were performed on a Netzsch TG209 thermal analyzer from room temperature to 800  $^{\circ}\text{C}$  under  $\text{N}_2$  atmosphere at a heating rate of 10  $^{\circ}\text{C}/\text{min}$ . All magnetization data were recorded on a Quantum Design SQUID MPMS3 magnetometer. The variable-temperature magnetization was measured with an external magnetic field of 1000 Oe in the temperature range of 3-300 K.

## X-ray Crystallography

Single crystals of **Fe<sub>6</sub>** and **Fe<sub>18</sub>** with appropriate dimensions were chosen under an optical microscope and quickly coated with high vacuum grease (Dow Corning Corporation) before being mounted on a glass fiber for data collections. Single-crystal X-ray diffraction data of **Fe<sub>6</sub>** and **Fe<sub>18</sub>** were collected using a Rigaku XtaLAB MM007 CCD diffractometer with Cu K $\alpha$  radiation ( $\lambda = 1.5418 \text{ \AA}$ ) radiation. Structures of **Fe<sub>6</sub>** and **Fe<sub>18</sub>** were solved using SHELXS-97 (direct methods) and refined using SHELXL-97 (full-matrix least-squares on  $F^2$ ).<sup>[1]</sup> Hydrogen atoms were placed in calculated positions and included as riding atoms with isotropic displacement parameters 1.2-1.5 times  $U_{eq}$  of the attached C atoms. The X-ray crystallographic coordinates for structures reported in this article have been deposited at the Cambridge Crystallographic Data Centre (CCDC). CCDC: 2080069 (**Fe<sub>18</sub>**) and 2080070 (**Fe<sub>6</sub>**). Furthermore, All structures were examined using the Addsym subroutine of PLATON<sup>[2]</sup> to assure that no additional symmetry could be applied to the models. Pertinent crystallographic data collection and refinement parameters of **Fe<sub>6</sub>** and **Fe<sub>18</sub>** are collated in Table S1. Selected bond lengths and angles are collated in Table S2.

## Synthesis of $[\text{Fe}_{18}\text{O}_8(\text{OH})_8(\text{H}_2\text{thmmg})_{10}]$ ( $\text{Fe}_{18}$ )

A mixture of  $\text{H}_3\text{thmmg}$  (17.9 mg, 0.1 mmol),  $\text{Fe}(\text{NO}_3)_3 \cdot 9\text{H}_2\text{O}$  (40.4 mg, 0.1 mmol), triethanolamine (14.9 mg, 0.1 mmol), KCl (7.5 mg, 0.1 mmol),  $\text{H}_2\text{O}$  (4 mL),  $\text{CH}_3\text{OH}$  (4 mL) were sealed in a 20 mL glass reaction bottle, and 40  $\mu\text{L}$  triethylamine was slowly added into the mixture while ultrasound, then transferred to a preheated oven at 65 °C for 3 days. We can obtain red-block crystals  $\text{Fe}_{18}$ . The crystals  $\text{Fe}_{18}$  were isolated by filtration, washed with  $\text{H}_2\text{O}$  and Methanol, and dried in air (yield 33.2 % based on Fe). Elemental analyses calc. (found) for  $\text{Fe}_{18}$ :  $\text{C}_{60}\text{H}_{104}\text{Fe}_{18}\text{N}_{10}\text{O}_{66}$ : C, 23.81 (23.78); H, 3.46 (3.50); N, 4.63 (4.59) %. Selected IR peaks ( $\text{cm}^{-1}$ ): 3434 (s), 2964 (m), 2925 (m), 2856 (m), 2296 (w), 1629 (s), 1381 (m), 1080 (m), 1043 (m), 929 (w), 879 (w), 565 (w).

## Synthesis of $[\text{Fe}_6(\text{H}_2\text{thmmg})_6]$ ( $\text{Fe}_6$ )

A mixture of  $\text{H}_3\text{thmmg}$  (17.9 mg, 0.1 mmol),  $\text{Fe}(\text{NO}_3)_3 \cdot 9\text{H}_2\text{O}$  (40.4 mg, 0.1 mmol), triethanolamine (14.9 mg, 0.1 mmol), KCl (7.5 mg, 0.1 mmol),  $\text{H}_2\text{O}$  (4 mL),  $\text{CH}_3\text{OH}$  (4 mL) were sealed in a 20 mL glass reaction bottle, and 30  $\mu\text{L}$  triethylamine was slowly added into the mixture while ultrasound, then transferred to a preheated oven at 65 °C for five hours. We can obtain yellow-block crystals  $\text{Fe}_6$ . The crystals  $\text{Fe}_6$  were isolated by filtration, washed with  $\text{H}_2\text{O}$  and Methanol, and dried in air (yield 24.1 % based on Fe). Elemental analyses calc. (found) for  $\text{Fe}_6$ :  $\text{C}_{36}\text{H}_{60}\text{Fe}_6\text{N}_6\text{O}_{30}$ : C, 31.1 (30.5); H, 4.3 (4.5); N, 6.0 (6.2) %. Selected IR peaks ( $\text{cm}^{-1}$ ): 3434 (s), 2923 (m), 2854 (m), 2339 (w), 1635 (s), 1440 (w), 1348 (m), 1224 (w), 1153 (w), 1086 (m), 1031 (m), 804 (w), 719(w), 632(w), 588(m), 507(m).

## The transformation from $\text{Fe}_6$ to $\text{Fe}_{18}$

When we obtain yellow-block crystals  $\text{Fe}_6$  in the solution, 10  $\mu\text{L}$  triethylamine was slowly added into the mixture. Then transferred to a preheated oven at 65 °C for 3 days. We can obtain red-block crystals  $\text{Fe}_{18}$ .

**Fig. S1: The coordinative modes of H<sub>5</sub>thmmg ligands in Fe<sub>6</sub> and Fe<sub>18</sub> clusters.**

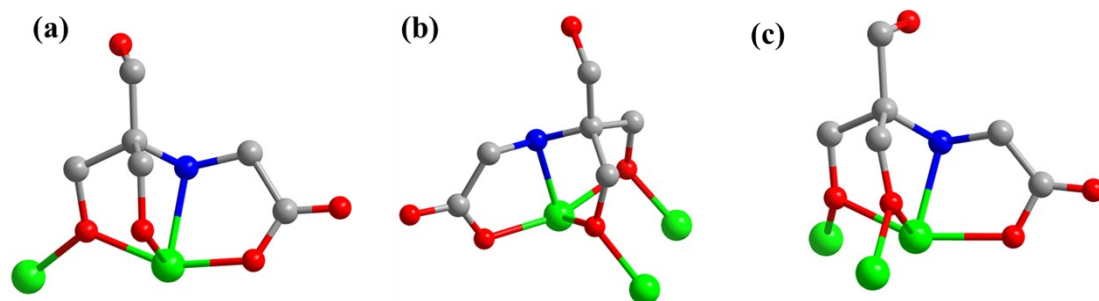

**Fig. S2: The molecule packing of Fe<sub>18</sub> and Fe<sub>6</sub> in the unit cell.**

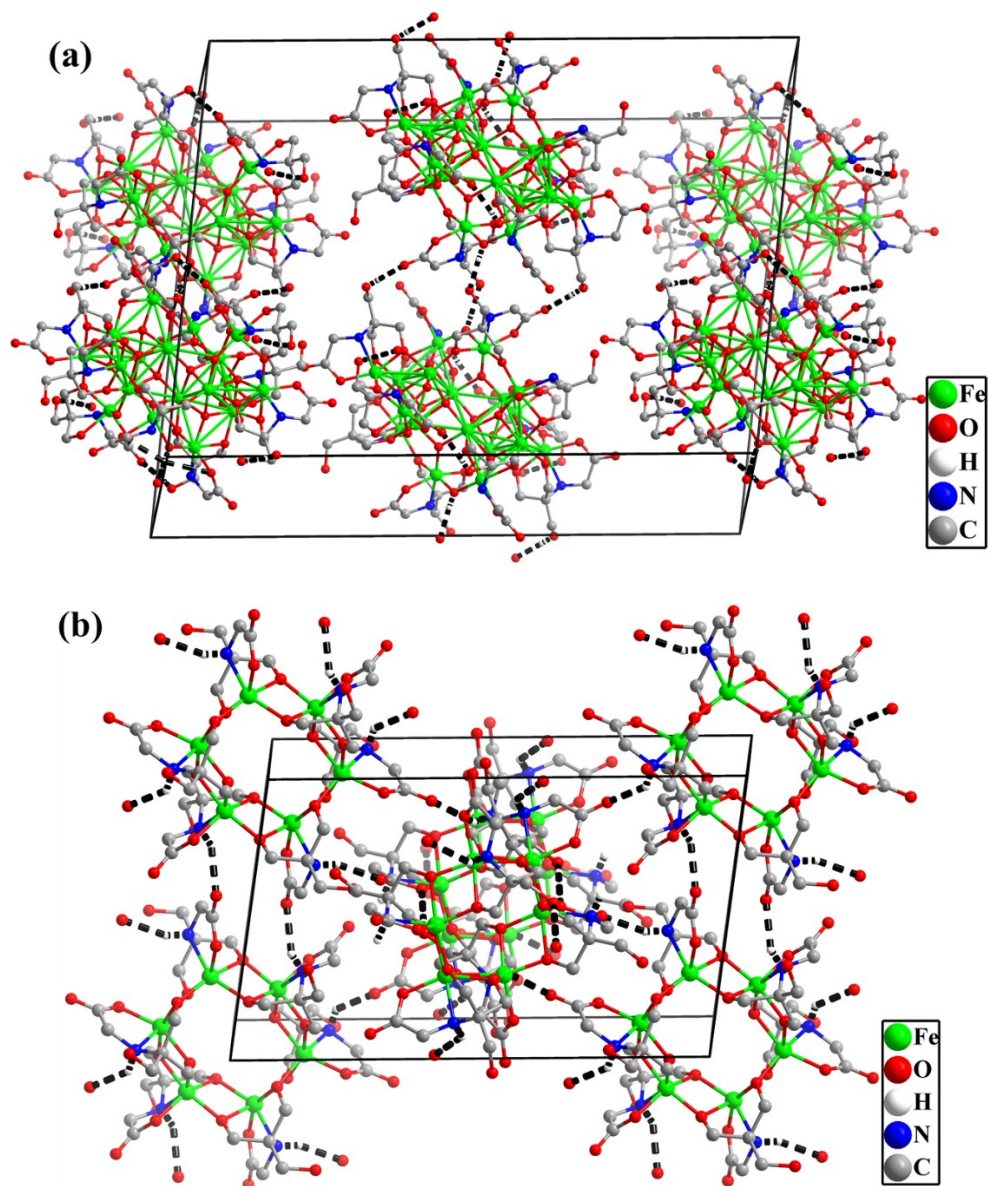

**Fig. S3: The IR spectra of Fe<sub>18</sub>, Fe<sub>18-trans</sub> and Fe<sub>6</sub>.**

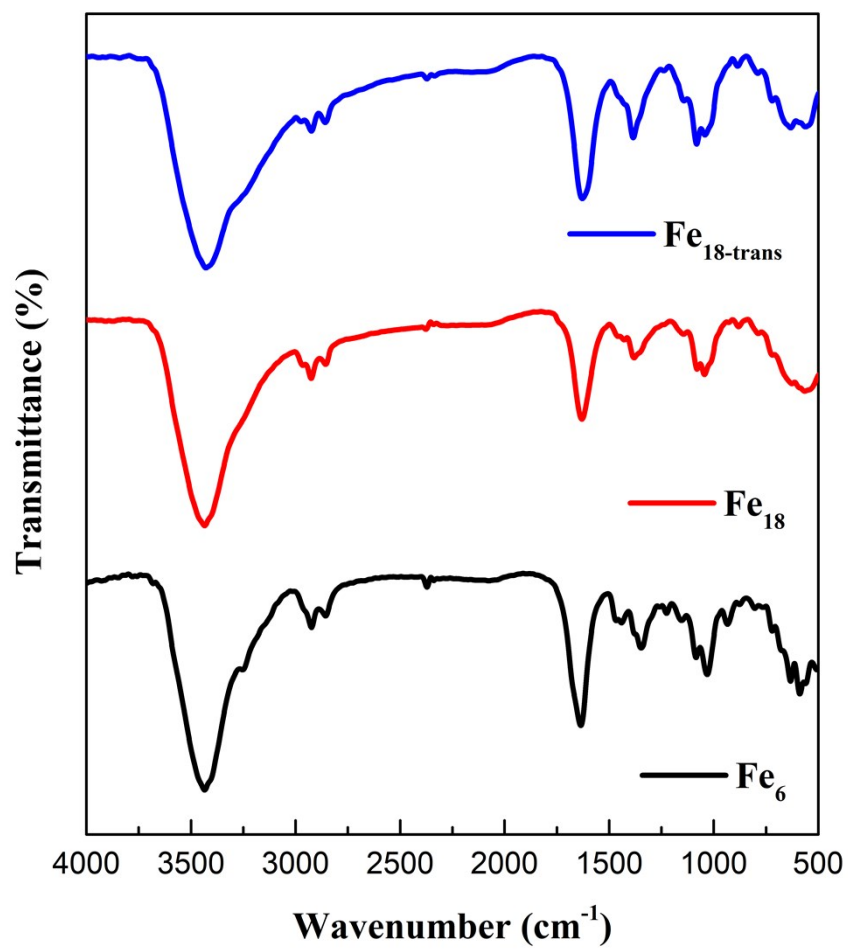

**Fig. S4: The TGA of Fe<sub>18</sub> and Fe<sub>6</sub>.**

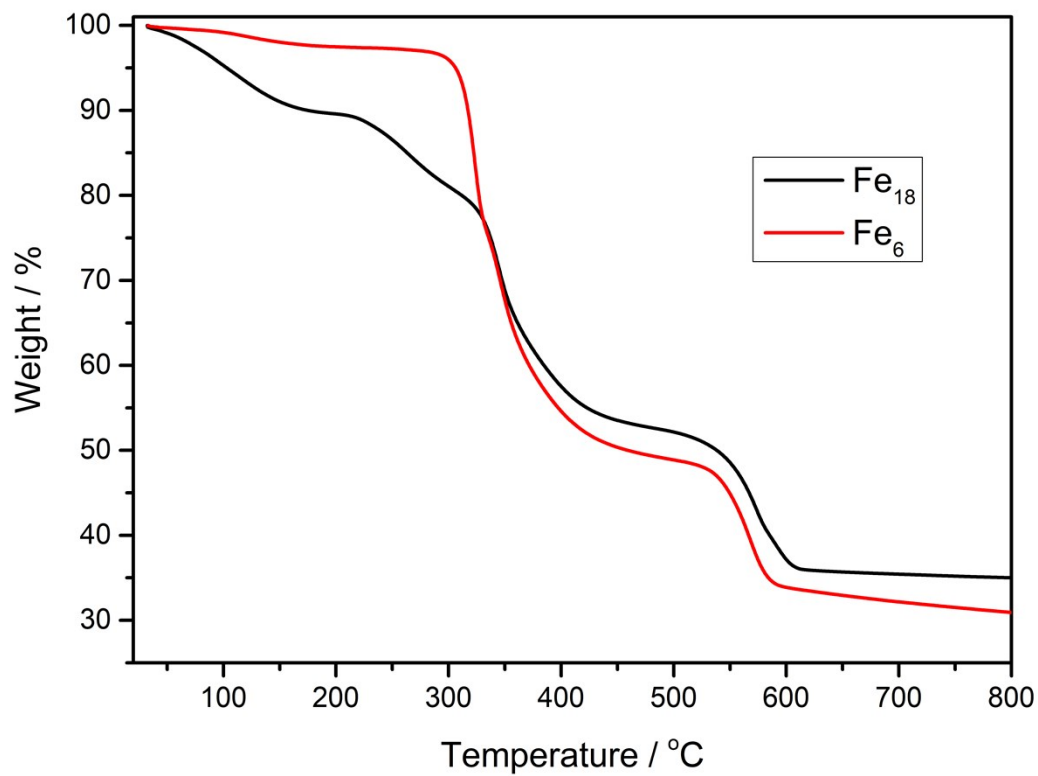



**Fig. S5: Plots of the temperature dependence of  $\chi_m^{-1}$  between 160-300 K for  $\text{Fe}_6$  and  $\text{Fe}_{18}$ .**

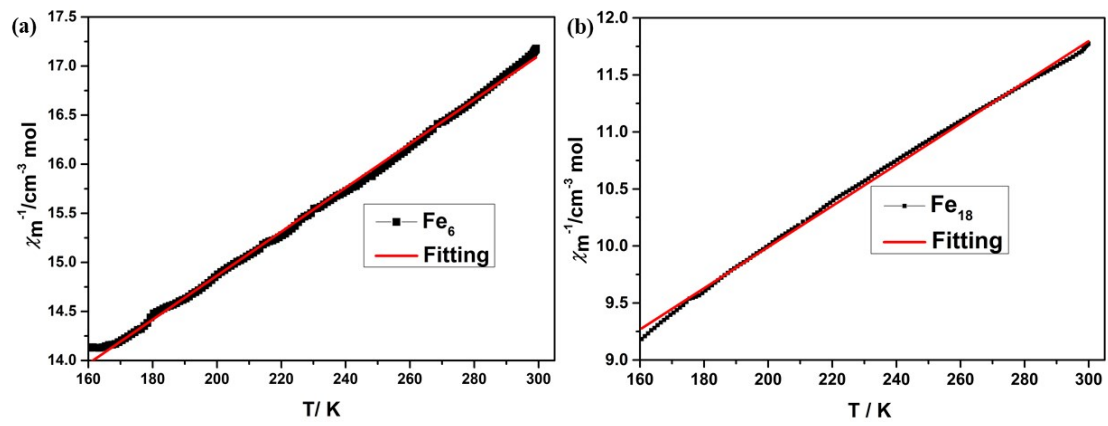

**Table S1: Crystal data for Fe<sub>18</sub> and Fe<sub>6</sub>.**

| Identification code                         | <b>Fe<sub>18</sub></b>                                                            | <b>Fe<sub>6</sub></b>                                                          |
|---------------------------------------------|-----------------------------------------------------------------------------------|--------------------------------------------------------------------------------|
| Empirical formula                           | C <sub>60</sub> H <sub>104</sub> Fe <sub>18</sub> N <sub>10</sub> O <sub>66</sub> | C <sub>36</sub> H <sub>60</sub> Fe <sub>6</sub> N <sub>6</sub> O <sub>30</sub> |
| Formula weight                              | 3026.83                                                                           | 1392.00                                                                        |
| Temperature/K                               | 117(20)                                                                           | 100.00(10)                                                                     |
| Crystal system                              | monoclinic                                                                        | triclinic                                                                      |
| Space group                                 | <i>C2/c</i>                                                                       | <i>P-1</i>                                                                     |
| <i>a</i> /Å                                 | 24.6598(10)                                                                       | 11.8437(7)                                                                     |
| <i>b</i> /Å                                 | 15.4024(7)                                                                        | 13.2329(8)                                                                     |
| <i>c</i> /Å                                 | 33.2312(13)                                                                       | 20.6099(10)                                                                    |
| $\alpha$ /°                                 | 90                                                                                | 78.264(4)                                                                      |
| $\beta$ /°                                  | 97.015(4)                                                                         | 80.601(4)                                                                      |
| $\gamma$ /°                                 | 90                                                                                | 73.213(5)                                                                      |
| Volume/Å <sup>3</sup>                       | 12527.4(9)                                                                        | 3008.9(3)                                                                      |
| <i>Z</i>                                    | 4                                                                                 | 2                                                                              |
| $\rho_{\text{calc}}$ /cm <sup>3</sup>       | 1.605                                                                             | 1.536                                                                          |
| $\mu$ /mm <sup>-1</sup>                     | 16.963                                                                            | 12.060                                                                         |
| F(000)                                      | 6120.0                                                                            | 1428.0                                                                         |
| Radiation                                   | CuK $\alpha$<br>( $\lambda = 1.54184$ )                                           | CuK $\alpha$<br>( $\lambda = 1.54184$ )                                        |
| 2 $\theta$ range for data collection/°      | 7.128 to 152.644                                                                  | 7.074 to 147.458                                                               |
| Index ranges                                | -29 $\leq$ h $\leq$ 29,<br>-16 $\leq$ k $\leq$ 19,<br>-39 $\leq$ l $\leq$ 41      | -14 $\leq$ h $\leq$ 14,<br>-16 $\leq$ k $\leq$ 15,<br>-25 $\leq$ l $\leq$ 22   |
| Reflections collected                       | 22743                                                                             | 27826                                                                          |
| Independent reflections                     | 11964<br>[ $R_{\text{int}} = 0.0627$ ,<br>$R_{\text{sigma}} = 0.1032$ ]           | 11235<br>[ $R_{\text{int}} = 0.0645$ ,<br>$R_{\text{sigma}} = 0.0711$ ]        |
| Data/restraints/parameters                  | 11964/6/699                                                                       | 11235/0/709                                                                    |
| Goodness-of-fit on F <sup>2</sup>           | 1.073                                                                             | 1.077                                                                          |
| Final R indexes [ $I \geq 2\sigma(I)$ ]     | $R_1 = 0.0723$ ,<br>$wR_2 = 0.1928$                                               | $R_1 = 0.0844$ ,<br>$wR_2 = 0.2262$                                            |
| Final R indexes [all data]                  | $R_1 = 0.1002$ ,<br>$wR_2 = 0.2154$                                               | $R_1 = 0.1044$ ,<br>$wR_2 = 0.2373$                                            |
| Largest diff. peak/hole / e Å <sup>-3</sup> | 1.32/-1.09                                                                        | 1.62/-0.75                                                                     |

**Table S2: Selected bond distances (Å) and angles (°) for Fe<sub>18</sub> and Fe<sub>6</sub>.**

| Fe <sub>18</sub>                       |           |                                       |            |
|----------------------------------------|-----------|---------------------------------------|------------|
| Fe1—O3                                 | 1.982 (5) | Fe5—O25                               | 1.957 (5)  |
| Fe1—O4                                 | 1.941 (5) | Fe5—O27 <sup>i</sup>                  | 2.081 (5)  |
| Fe1—O23 <sup>i</sup>                   | 2.057 (5) | Fe5—O33                               | 2.322 (5)  |
| Fe1—O25 <sup>i</sup>                   | 2.180 (5) | Fe6—O1 <sup>i</sup>                   | 2.001 (5)  |
| Fe1—O26 <sup>i</sup>                   | 1.994 (5) | Fe6—O3 <sup>i</sup>                   | 2.176 (5)  |
| Fe1—O27                                | 1.990 (5) | Fe6—O27                               | 1.942 (5)  |
| Fe2—N3 <sup>i</sup>                    | 2.180 (7) | Fe6—O27 <sup>i</sup>                  | 2.084 (5)  |
| Fe2—O2                                 | 1.941 (5) | Fe6—O28                               | 1.975 (5)  |
| Fe2—O3                                 | 1.910 (5) | Fe6—O33                               | 1.963 (5)  |
| Fe2—O28 <sup>i</sup>                   | 2.012 (5) | Fe7—O3 <sup>i</sup>                   | 2.059 (5)  |
| Fe2—O29 <sup>i</sup>                   | 2.137 (5) | Fe7—O10                               | 1.967 (5)  |
| Fe2—O32 <sup>i</sup>                   | 2.003 (5) | Fe7—O24                               | 1.977 (5)  |
| Fe3—N1                                 | 2.199 (7) | Fe7—O25                               | 2.138 (5)  |
| Fe3—O1                                 | 1.832 (5) | Fe7—O29                               | 1.958 (5)  |
| Fe3—O2                                 | 1.996 (5) | Fe7—O33                               | 2.067 (5)  |
| Fe3—O4                                 | 2.053 (5) | Fe8—N4                                | 2.197 (6)  |
| Fe3—O5                                 | 2.079 (5) | Fe8—O19                               | 1.969 (5)  |
| Fe3—O7                                 | 2.052 (5) | Fe8—O20                               | 2.020 (5)  |
| Fe4—N2                                 | 2.171 (6) | Fe8—O23                               | 2.044 (5)  |
| Fe4—O5                                 | 1.948 (5) | Fe8—O24                               | 2.050 (5)  |
| Fe4—O9                                 | 1.995 (5) | Fe8—O25                               | 1.944 (5)  |
| Fe4—O10                                | 2.134 (5) | Fe9—N5                                | 2.179 (6)  |
| Fe4—O12                                | 1.990 (6) | Fe9—O14                               | 1.938 (6)  |
| Fe4—O33                                | 1.901 (5) | Fe9—O15                               | 1.964 (5)  |
| Fe5—O1                                 | 1.905 (5) | Fe9—O17                               | 2.161 (6)  |
| Fe5—O9                                 | 1.961 (5) | Fe9—O19                               | 2.004 (5)  |
| Fe5—O14                                | 1.947 (6) | Fe9—O26                               | 1.929 (5)  |
| O3—Fe1—O23 <sup>i</sup>                | 95.7 (2)  | O14—Fe5—O25                           | 89.7 (2)   |
| O3—Fe1—O25 <sup>i</sup>                | 81.9 (2)  | O14—Fe5—O27 <sup>i</sup>              | 102.5 (2)  |
| O3—Fe1—O26 <sup>i</sup>                | 170.5 (2) | O14—Fe5—O33                           | 172.4 (2)  |
| O3—Fe1—O27                             | 85.6 (2)  | O25—Fe5—O9                            | 97.8 (2)   |
| O4—Fe1—O3                              | 88.9 (2)  | O25—Fe5—O27 <sup>i</sup>              | 83.9 (2)   |
| O4—Fe1—O23 <sup>i</sup>                | 94.5 (2)  | O25—Fe5—O33                           | 82.7 (2)   |
| O4—Fe1—O25 <sup>i</sup>                | 168.3 (2) | O27 <sup>i</sup> —Fe5—O33             | 77.02 (19) |
| O4—Fe1—O26 <sup>i</sup>                | 100.4 (2) | O27—Fe6—O1 <sup>i</sup>               | 82.1 (2)   |
| O4—Fe1—O27                             | 105.9 (2) | O27—Fe6—O3 <sup>i</sup>               | 163.6 (2)  |
| O23 <sup>i</sup> —Fe1—O25 <sup>i</sup> | 79.5 (2)  | O27 <sup>i</sup> —Fe6—O3 <sup>i</sup> | 78.57 (19) |
| O26 <sup>i</sup> —Fe1—O23 <sup>i</sup> | 85.8 (2)  | O27—Fe6—O27 <sup>i</sup>              | 86.1 (2)   |
| O26 <sup>i</sup> —Fe1—O25 <sup>i</sup> | 89.2 (2)  | O27—Fe6—O28                           | 115.1 (2)  |

|                                        |           |                          |            |
|----------------------------------------|-----------|--------------------------|------------|
| O27—Fe1—O23 <sup>i</sup>               | 159.6 (2) | O27—Fe6—O33              | 103.2 (2)  |
| O27—Fe1—O25 <sup>i</sup>               | 80.6 (2)  | O28—Fe6—O1 <sup>i</sup>  | 86.9 (2)   |
| O27—Fe1—O26 <sup>i</sup>               | 89.8 (2)  | O28—Fe6—O3 <sup>i</sup>  | 79.3 (2)   |
| O2—Fe2—N3 <sup>i</sup>                 | 112.9 (2) | O28—Fe6—O27 <sup>i</sup> | 157.2 (2)  |
| O2—Fe2—O28 <sup>i</sup>                | 98.4 (2)  | O33—Fe6—O1 <sup>i</sup>  | 171.3 (2)  |
| O2—Fe2—O29 <sup>i</sup>                | 171.3 (2) | O33—Fe6—O3 <sup>i</sup>  | 81.71 (19) |
| O2—Fe2—O32 <sup>i</sup>                | 89.8 (2)  | O33—Fe6—O27 <sup>i</sup> | 85.5 (2)   |
| O3—Fe2—N3 <sup>i</sup>                 | 149.5 (2) | O33—Fe6—O28              | 96.8 (2)   |
| O3—Fe2—O2                              | 94.6 (2)  | O3 <sup>i</sup> —Fe7—O25 | 81.2 (2)   |
| O3—Fe2—O28 <sup>i</sup>                | 85.1 (2)  | O3 <sup>i</sup> —Fe7—O33 | 82.2 (2)   |
| O3—Fe2—O29 <sup>i</sup>                | 78.1 (2)  | O10—Fe7—O3 <sup>i</sup>  | 160.9 (2)  |
| O3—Fe2—O32 <sup>i</sup>                | 114.0 (2) | O10—Fe7—O24              | 98.1 (2)   |
| O28 <sup>i</sup> —Fe2—N3 <sup>i</sup>  | 78.3 (2)  | O10—Fe7—O25              | 102.8 (2)  |
| O28 <sup>i</sup> —Fe2—O29 <sup>i</sup> | 85.8 (2)  | O10—Fe7—O33              | 79.6 (2)   |
| O29 <sup>i</sup> —Fe2—N3 <sup>i</sup>  | 75.3 (2)  | O24—Fe7—O3 <sup>i</sup>  | 101.1 (2)  |
| O32 <sup>i</sup> —Fe2—N3 <sup>i</sup>  | 80.4 (2)  | O24—Fe7—O25              | 77.9 (2)   |
| O32 <sup>i</sup> —Fe2—O28 <sup>i</sup> | 158.6 (2) | O24—Fe7—O33              | 161.8 (2)  |
| O32 <sup>i</sup> —Fe2—O29 <sup>i</sup> | 88.9 (2)  | O29—Fe7—O3 <sup>i</sup>  | 79.0 (2)   |
| O1—Fe3—N1                              | 172.2 (2) | O29—Fe7—O10              | 99.4 (2)   |
| O1—Fe3—O2                              | 91.9 (2)  | O29—Fe7—O24              | 95.3 (2)   |
| O1—Fe3—O4                              | 101.5 (2) | O29—Fe7—O25              | 157.4 (2)  |
| O1—Fe3—O5                              | 96.3 (2)  | O29—Fe7—O33              | 102.9 (2)  |
| O1—Fe3—O7                              | 102.5 (2) | O33—Fe7—O25              | 85.0 (2)   |
| O2—Fe3—N1                              | 95.9 (2)  | O19—Fe8—N4               | 109.3 (2)  |
| O2—Fe3—O4                              | 94.6 (2)  | O19—Fe8—O20              | 89.0 (2)   |
| O2—Fe3—O5                              | 171.7 (2) | O19—Fe8—O23              | 95.0 (2)   |
| O2—Fe3—O7                              | 87.6 (2)  | O19—Fe8—O24              | 171.5 (2)  |
| O4—Fe3—N1                              | 78.7 (2)  | O20—Fe8—N4               | 79.1 (2)   |
| O4—Fe3—O5                              | 82.2 (2)  | O20—Fe8—O23              | 154.7 (2)  |
| O5—Fe3—N1                              | 76.0 (2)  | O20—Fe8—O24              | 90.5 (2)   |
| O7—Fe3—N1                              | 77.1 (2)  | O23—Fe8—N4               | 76.1 (2)   |
| O7—Fe3—O4                              | 155.8 (2) | O23—Fe8—O24              | 89.1 (2)   |
| O7—Fe3—O5                              | 92.1 (2)  | O24—Fe8—N4               | 78.9 (2)   |
| O5—Fe4—N2                              | 95.0 (2)  | O25—Fe8—N4               | 152.7 (2)  |
| O5—Fe4—O9                              | 88.6 (2)  | O25—Fe8—O19              | 92.0 (2)   |
| O5—Fe4—O10                             | 168.6 (2) | O25—Fe8—O20              | 119.3 (2)  |
| O5—Fe4—O12                             | 93.0 (2)  | O25—Fe8—O23              | 85.6 (2)   |
| O9—Fe4—N2                              | 79.6 (2)  | O25—Fe8—O24              | 80.8 (2)   |
| O9—Fe4—O10                             | 83.6 (2)  | O14—Fe9—N5               | 164.3 (2)  |
| O10—Fe4—N2                             | 75.5 (2)  | O14—Fe9—O15              | 94.6 (2)   |
| O12—Fe4—N2                             | 80.9 (2)  | O14—Fe9—O17              | 86.3 (2)   |
| O12—Fe4—O9                             | 160.5 (2) | O14—Fe9—O19              | 107.3 (2)  |
| O12—Fe4—O10                            | 91.6 (2)  | O15—Fe9—N5               | 79.0 (2)   |

|                                             |           |                                          |           |
|---------------------------------------------|-----------|------------------------------------------|-----------|
| O33—Fe4—N2                                  | 152.9 (2) | O15—Fe9—O17                              | 87.1 (2)  |
| O33—Fe4—O5                                  | 108.6 (2) | O15—Fe9—O19                              | 154.8 (2) |
| O33—Fe4—O9                                  | 87.7 (2)  | O17—Fe9—N5                               | 79.2 (2)  |
| O33—Fe4—O10                                 | 79.4 (2)  | O19—Fe9—N5                               | 76.6 (2)  |
| O33—Fe4—O12                                 | 110.1 (2) | O19—Fe9—O17                              | 82.1 (2)  |
| O1—Fe5—O9                                   | 92.7 (2)  | O26—Fe9—N5                               | 95.4 (2)  |
| O1—Fe5—O14                                  | 100.8 (2) | O26—Fe9—O14                              | 99.6 (2)  |
| O1—Fe5—O25                                  | 163.1 (2) | O26—Fe9—O15                              | 97.1 (2)  |
| O1—Fe5—O27 <sup>i</sup>                     | 80.9 (2)  | O26—Fe9—O17                              | 172.4 (2) |
| O1—Fe5—O33                                  | 86.7 (2)  | O26—Fe9—O19                              | 91.5 (2)  |
| O9—Fe5—O27 <sup>i</sup>                     | 154.2 (2) | O26—Fe9—O17                              | 172.4 (2) |
| O9—Fe5—O33                                  | 77.7 (2)  | O26—Fe9—O19                              | 91.5 (2)  |
| O14—Fe5—O9                                  | 103.3 (2) |                                          |           |
| Symmetry code: (i) $-x+3/2, -y+1/2, -z+1$ . |           |                                          |           |
| <b>Fe<sub>6</sub></b>                       |           |                                          |           |
| Fe1—O5                                      | 1.951 (5) | Fe4—O19                                  | 1.938 (5) |
| Fe1—O7 <sup>i</sup>                         | 2.010 (6) | Fe4—O20                                  | 1.945 (5) |
| Fe1—O9 <sup>i</sup>                         | 2.079 (5) | Fe4—O25 <sup>ii</sup>                    | 1.983 (6) |
| Fe1—O10 <sup>i</sup>                        | 2.026 (5) | Fe4—O26 <sup>ii</sup>                    | 2.080 (5) |
| Fe1—O15                                     | 1.958 (5) | Fe4—O29 <sup>ii</sup>                    | 2.038 (5) |
| Fe1—N1 <sup>i</sup>                         | 2.155 (6) | Fe4—N6 <sup>ii</sup>                     | 2.163 (7) |
| Fe2—O4                                      | 1.952 (5) | Fe5—O20 <sup>ii</sup>                    | 2.004 (5) |
| Fe2—O10                                     | 1.972 (5) | Fe5—O22 <sup>ii</sup>                    | 1.994 (5) |
| Fe2—O11 <sup>i</sup>                        | 2.022 (5) | Fe5—O28 <sup>ii</sup>                    | 2.050 (5) |
| Fe2—O14 <sup>i</sup>                        | 1.983 (5) | Fe5—O29                                  | 1.972 (5) |
| Fe2—O15 <sup>i</sup>                        | 2.039 (5) | Fe5—O30                                  | 1.938 (5) |
| Fe2—N3 <sup>i</sup>                         | 2.154 (6) | Fe5—N4 <sup>ii</sup>                     | 2.154 (6) |
| Fe3—O2 <sup>i</sup>                         | 1.991 (5) | Fe3—O4 <sup>i</sup>                      | 2.019(5)  |
| Fe3—O5 <sup>i</sup>                         | 2.047 (5) | Fe6—O26                                  | 1.944 (5) |
| Fe3—O9                                      | 1.939 (5) | Fe6—O28                                  | 1.982 (5) |
| Fe3—O11                                     | 1.968 (5) | Fe6—O30 <sup>ii</sup>                    | 2.038 (5) |
| Fe3—N2 <sup>i</sup>                         | 2.167 (7) | Fe6—N5 <sup>ii</sup>                     | 2.169 (7) |
| O5—Fe1—O7 <sup>i</sup>                      | 99.2 (2)  | O19—Fe4—O20                              | 99.9 (2)  |
| O5—Fe1—O9 <sup>i</sup>                      | 75.6 (2)  | O19—Fe4—O25 <sup>ii</sup>                | 100.2 (2) |
| O5—Fe1—O10 <sup>i</sup>                     | 108.6 (2) | O19—Fe4—O26 <sup>ii</sup>                | 76.3 (2)  |
| O5—Fe1—O15                                  | 99.8 (2)  | O19—Fe4—O29 <sup>ii</sup>                | 107.0 (2) |
| O5—Fe1—N1 <sup>i</sup>                      | 151.3 (2) | O19—Fe4—N6 <sup>ii</sup>                 | 154.0 (2) |
| O7 <sup>i</sup> —Fe1—O9 <sup>i</sup>        | 100.4 (2) | O20—Fe4—O25 <sup>ii</sup>                | 97.5 (2)  |
| O7 <sup>i</sup> —Fe1—O10 <sup>i</sup>       | 152.1 (2) | O20—Fe4—O26 <sup>ii</sup>                | 162.1 (2) |
| O7 <sup>i</sup> —Fe1—N1 <sup>i</sup>        | 79.3 (2)  | O20—Fe4—O29 <sup>ii</sup>                | 76.4 (2)  |
| O9 <sup>i</sup> —Fe1—N1 <sup>i</sup>        | 76.5 (2)  | O20—Fe4—N6 <sup>ii</sup>                 | 105.8 (2) |
| O10 <sup>i</sup> —Fe1—O9 <sup>i</sup>       | 88.6 (2)  | O25 <sup>ii</sup> —Fe4—O26 <sup>ii</sup> | 100.4 (2) |
| O10 <sup>i</sup> —Fe1—N1 <sup>i</sup>       | 77.2 (2)  | O25 <sup>ii</sup> —Fe4—O29 <sup>ii</sup> | 152.7 (2) |

|                                                                  |           |                                          |           |
|------------------------------------------------------------------|-----------|------------------------------------------|-----------|
| O15—Fe1—O7 <sup>i</sup>                                          | 97.0 (2)  | O25 <sup>ii</sup> —Fe4—N6 <sup>ii</sup>  | 80.2 (3)  |
| O15—Fe1—O9 <sup>i</sup>                                          | 162.4 (2) | O26 <sup>ii</sup> —Fe4—N6 <sup>ii</sup>  | 78.2 (2)  |
| O15—Fe1—O10 <sup>i</sup>                                         | 76.7 (2)  | O29 <sup>ii</sup> —Fe4—O26 <sup>ii</sup> | 87.9 (2)  |
| O15—Fe1—N1 <sup>i</sup>                                          | 108.8 (2) | O29 <sup>ii</sup> —Fe4—N6 <sup>ii</sup>  | 76.2 (2)  |
| O4—Fe2—O10                                                       | 99.0 (2)  | O20 <sup>ii</sup> —Fe5—O28 <sup>ii</sup> | 88.0 (2)  |
| O4—Fe2—O11 <sup>i</sup>                                          | 77.2 (2)  | O20 <sup>ii</sup> —Fe5—N4 <sup>ii</sup>  | 77.1 (2)  |
| O4—Fe2—O14 <sup>i</sup>                                          | 97.2 (2)  | O22 <sup>ii</sup> —Fe5—O20 <sup>ii</sup> | 101.5 (2) |
| O4—Fe2—O15 <sup>i</sup>                                          | 162.7 (2) | O22 <sup>ii</sup> —Fe5—O28 <sup>ii</sup> | 152.1 (2) |
| O4—Fe2—N3 <sup>i</sup>                                           | 108.5 (2) | O22 <sup>ii</sup> —Fe5—N4 <sup>ii</sup>  | 79.2 (2)  |
| O10—Fe2—O11 <sup>i</sup>                                         | 108.8 (2) | O28 <sup>ii</sup> —Fe5—N4 <sup>ii</sup>  | 77.5 (2)  |
| O10—Fe2—O14 <sup>i</sup>                                         | 98.8 (2)  | O29—Fe5—O20 <sup>ii</sup>                | 76.6 (2)  |
| O10—Fe2—O15 <sup>i</sup>                                         | 76.1 (2)  | O29—Fe5—O22 <sup>ii</sup>                | 94.7 (2)  |
| O10—Fe2—N3 <sup>i</sup>                                          | 152.6 (2) | O29—Fe5—O28 <sup>ii</sup>                | 113.1 (2) |
| O11 <sup>i</sup> —Fe2—O15 <sup>i</sup>                           | 88.7 (2)  | O29—Fe5—N4 <sup>ii</sup>                 | 151.1 (2) |
| O11 <sup>i</sup> —Fe2—N3 <sup>i</sup>                            | 77.1 (2)  | O30—Fe5—O20 <sup>ii</sup>                | 164.7 (2) |
| O14 <sup>i</sup> —Fe2—O11 <sup>i</sup>                           | 152.4 (2) | O30—Fe5—O22 <sup>ii</sup>                | 93.7 (2)  |
| O14 <sup>i</sup> —Fe2—O15 <sup>i</sup>                           | 99.9 (2)  | O30—Fe5—O28 <sup>ii</sup>                | 77.7 (2)  |
| O14 <sup>i</sup> —Fe2—N3 <sup>i</sup>                            | 79.3 (2)  | O30—Fe5—O29                              | 103.8 (2) |
| O15 <sup>i</sup> —Fe2—N3 <sup>i</sup>                            | 77.3 (2)  | O30—Fe5—N4 <sup>ii</sup>                 | 104.8 (2) |
| O2 <sup>i</sup> —Fe3—O4 <sup>i</sup>                             | 102.0 (2) | O17 <sup>ii</sup> —Fe6—O19 <sup>ii</sup> | 153.3 (2) |
| O2 <sup>i</sup> —Fe3—O5 <sup>i</sup>                             | 152.1 (2) | O17 <sup>ii</sup> —Fe6—O30 <sup>ii</sup> | 101.3 (2) |
| O2 <sup>i</sup> —Fe3—N2 <sup>i</sup>                             | 78.9 (2)  | O17 <sup>ii</sup> —Fe6—N5 <sup>ii</sup>  | 78.7 (2)  |
| O4 <sup>i</sup> —Fe3—O5 <sup>i</sup>                             | 86.0 (2)  | O19 <sup>ii</sup> —Fe6—N5 <sup>ii</sup>  | 77.6 (2)  |
| O4 <sup>i</sup> —Fe3—N2 <sup>i</sup>                             | 75.8 (2)  | O26—Fe6—O17 <sup>ii</sup>                | 98.7 (2)  |
| O5 <sup>i</sup> —Fe3—N2 <sup>i</sup>                             | 77.3 (2)  | O26—Fe6—O19 <sup>ii</sup>                | 77.1 (2)  |
| O9—Fe3—O2 <sup>i</sup>                                           | 98.4 (2)  | O26—Fe6—O28                              | 101.7 (2) |
| O9—Fe3—O4 <sup>i</sup>                                           | 159.6 (2) | O26—Fe6—O30 <sup>ii</sup>                | 160.0 (2) |
| O9—Fe3—O5 <sup>i</sup>                                           | 76.6 (2)  | O26—Fe6—N5 <sup>ii</sup>                 | 107.5 (2) |
| O9—Fe3—O11                                                       | 99.4 (2)  | O28—Fe6—O17 <sup>ii</sup>                | 95.0 (2)  |
| O9—Fe3—N2 <sup>i</sup>                                           | 110.1 (2) | O28—Fe6—O19 <sup>ii</sup>                | 111.6 (2) |
| O11—Fe3—O2 <sup>i</sup>                                          | 96.0 (2)  | O28—Fe6—O30 <sup>ii</sup>                | 77.0 (2)  |
| O11—Fe3—O4 <sup>i</sup>                                          | 76.9 (2)  | O28—Fe6—N5 <sup>ii</sup>                 | 150.7 (2) |
| O11—Fe3—O5 <sup>i</sup>                                          | 111.9 (2) | O30 <sup>ii</sup> —Fe6—O19 <sup>ii</sup> | 84.7 (2)  |
| O11—Fe3—N2 <sup>i</sup>                                          | 150.4(2)  | O30 <sup>ii</sup> —Fe6—N5 <sup>ii</sup>  | 76.3 (2)  |
| Symmetry codes: (i) $-x+2, -y+1, -z+1$ ; (ii) $-x+1, -y+2, -z$ . |           |                                          |           |

## References

- [1] a) G. M. Sheldrick, *SHELXL-97, Program for the Refinement of Crystal*; University of Gottingen: Gottingen, Germany, **1997**. b) G. M. Sheldrick, *Acta Crystallogr.* **1990**, *A46*, 467. c) G. M. Sheldrick, *Acta Crystallogr.* **2008**, *A64*, 112.
- [2] A. L. Spek, *Implemented as the PLATON Procedure, a Multipurpose Crystallographic Tool*, Utrecht University, Utrecht, The Netherlands, **1998**.
